# Supplementary material for: Cu fractionation, isotopic analysis, and data processing via machine learning: new approaches for the diagnosis and follow up of Wilson's disease via ICP-MS
Source: Royal Society of Chemistry journal article supplement (doi:10.1039/d2ja00267a), 2022-11-10
Supplement: d2ja00267a1.pdf [file d2ja00267a1.pdf]

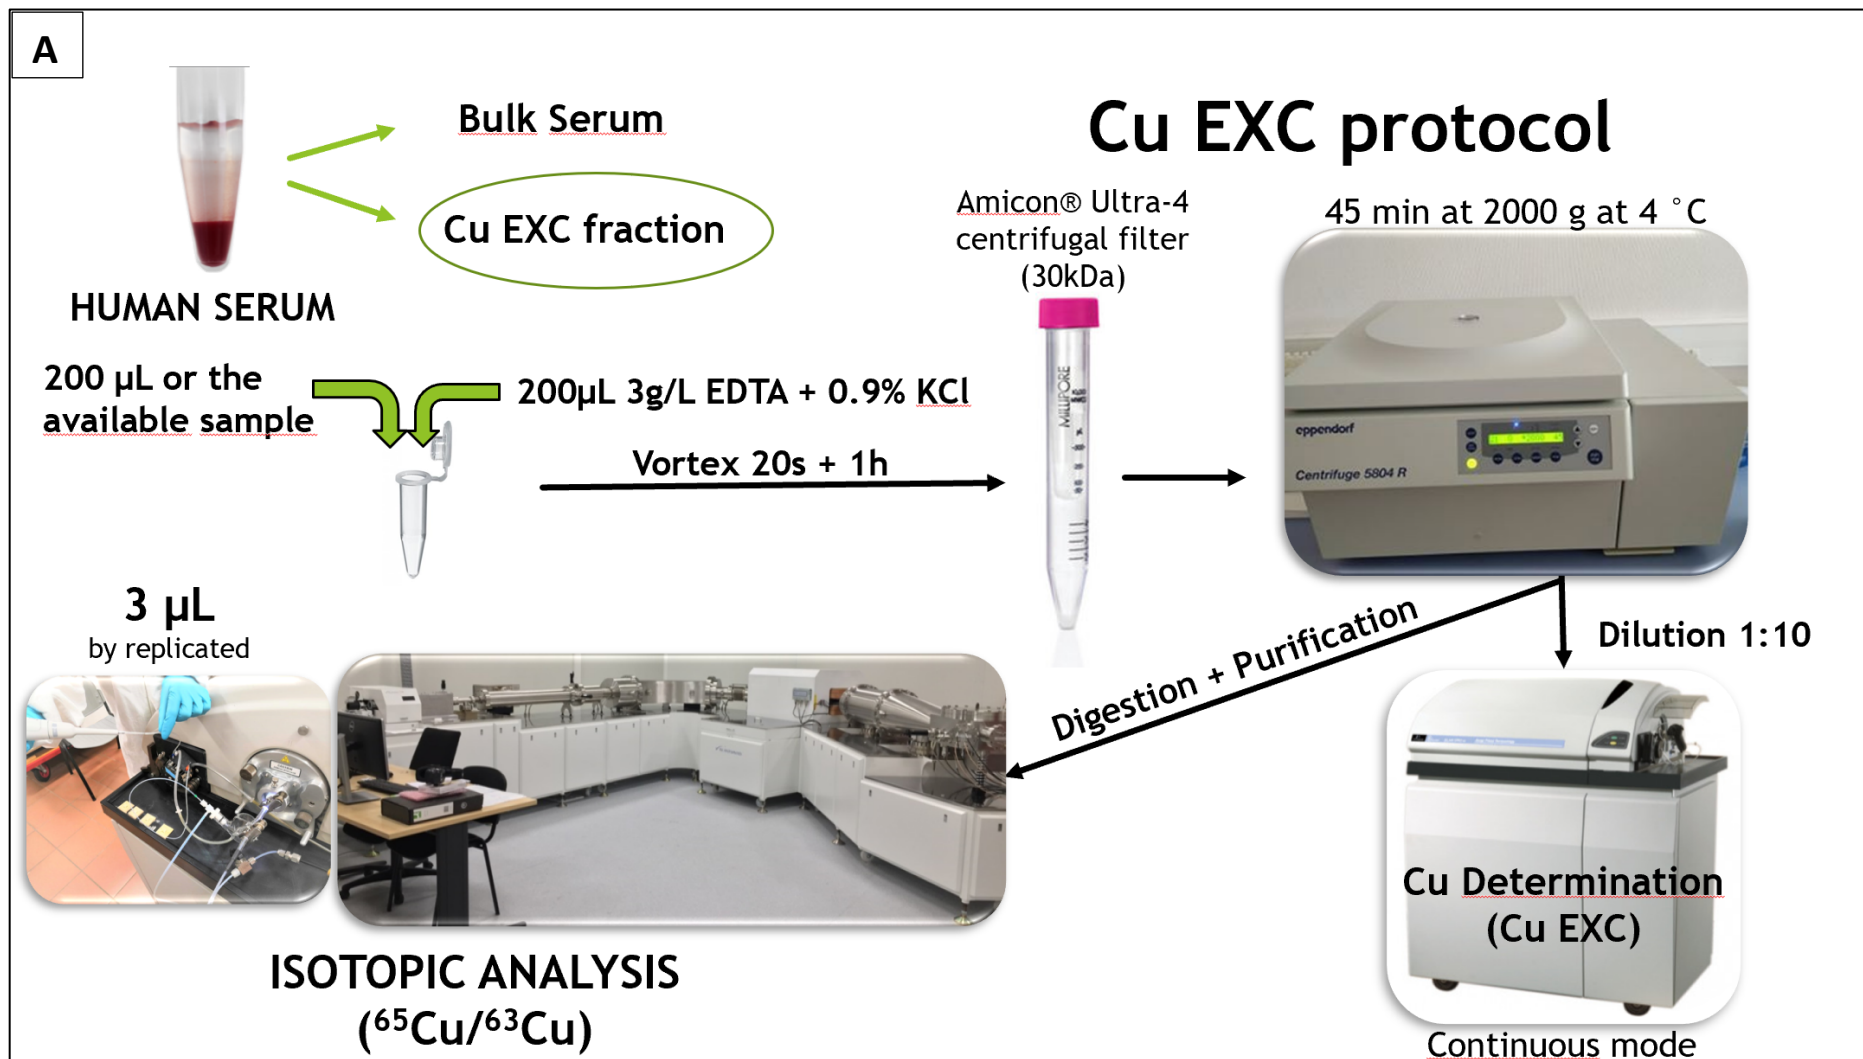

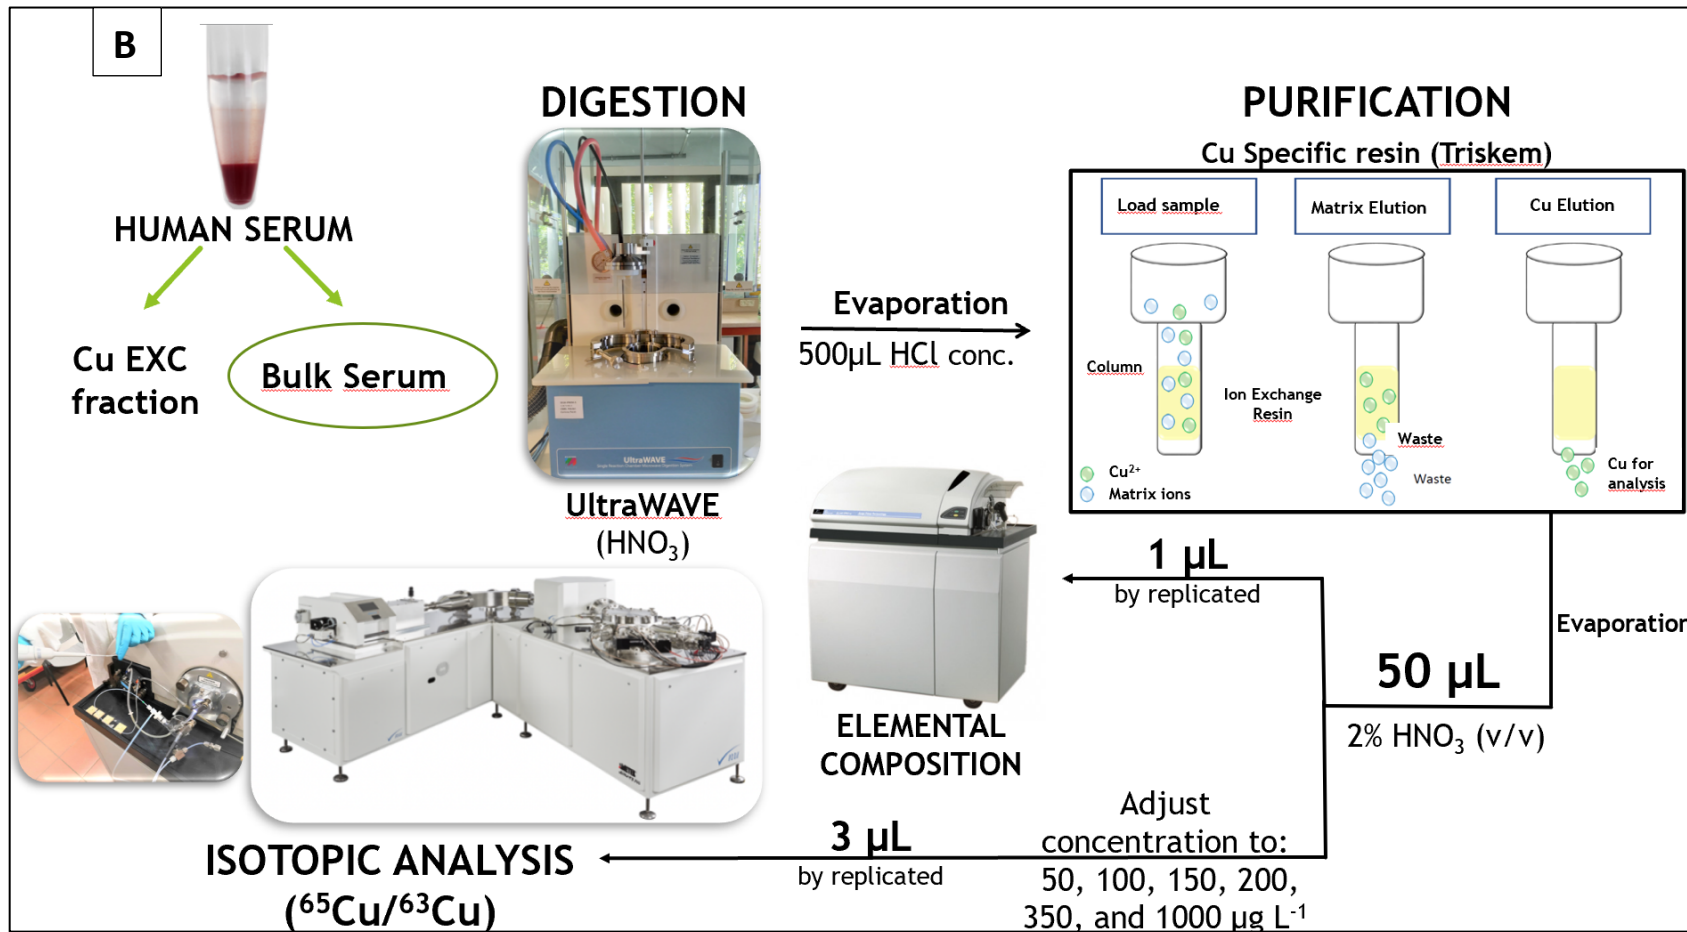

**Figure S1.** Schematics of the procedures for sample preparation for: A) Cu EXC fraction; B) Bulk fraction.

## Calculation of isotope ratios

For mass bias correction, a combination of internal normalization according to the exponential model described by Maréchal *et al.*<sup>41</sup> using the  $^{62}\text{Ni}/^{60}\text{Ni}$  ratio, following the equation (1S) and (2S) and the standard-sample-standard bracketing sequence with the NIST SRM 3114 were used.

$$R_{Cu} = r_{Cu} * \frac{1}{\left(\frac{65}{63}\right)^f} \quad (1S)$$

Where  $R_{Cu}$  is the real  $^{65}\text{Cu}/^{63}\text{Cu}$  isotope ratio,  $r_{Cu}$  is the measured isotope ratio and  $f$  is the exponential fractionation coefficient calculated following the equation (2S)

$$f = \frac{\ln \frac{r_{Ni}}{R_{Ni}}}{\ln \frac{62}{60}} \quad (2S)$$

Where  $R_{Ni}$  is the real of  $^{62}\text{Ni}/^{60}\text{Ni}$  value and  $r_{Ni}$  is the measured value (calculated by LRS).

Finally, the results were expressed as delta values ( $\delta$ ), *i.e.*, as a relative difference (in per mil) versus a reference (NIST SRM 3114) following equation (3S):

$$\delta^{65}\text{Cu} (\text{‰}) = \frac{(R_{sample} - R_{STD})}{R_{STD}} * 1000 \quad (3S)$$

where  $R_{sample}$  is the  $^{65}\text{Cu}/^{63}\text{Cu}$  isotope ratio determined for a given sample and  $R_{STD}$  is the average  $^{65}\text{Cu}/^{63}\text{Cu}$  isotope ratio determined for the standards measured before and after that particular sample.

**Table S1.** Protocol for Cu isolation with the anion exchange Cu specific resin (Triskem).

| <b>Step</b>    | <b>Volume (mL)</b> | <b>Medium</b>              |
|----------------|--------------------|----------------------------|
| Resin loading  | 0.5                | Cu-specific                |
| Cleaning       | 10                 | 6 mol L <sup>-1</sup> HCl  |
| Conditioning   | 10                 | 5 mmol L <sup>-1</sup> HCl |
| Sample load    | 4                  | 5 mmol L <sup>-1</sup> HCl |
| Matrix elution | 40                 | 5 mmol L <sup>-1</sup> HCl |
| Cu elution     | 10                 | 6 mol L <sup>-1</sup> HCl  |
